# Supplementary material for: Continuous addition kinetic elucidation: catalyst and reactant order, rate constant, and poisoning from a single experiment
Source: Royal Society of Chemistry journal article supplement (doi:10.1039/d3sc02698a), 2023-01-01
Supplement: d3sc02698a2.pdf [file d3sc02698a2.pdf]

Supporting Information for P.J.H Williams et al,  
"Continuous Addition Kinetic Elucidation: Catalyst and Reactant Order, Rate  
Constant, and Poisoning from a Single Experiment"

Mathematical Results and Derivations

Derivations of reactant concentration vs time and  $t_{1/2}$

Solution for  $m = 1$

$$-\frac{dR(t)}{dt} = kR(t)C(t)^n \quad (1)$$

$$C(t) = pt \quad (2)$$

Substitute (2) into (1) and separate variables:

$$\frac{dR(t)}{dt} = -kR(t)(pt)^n \quad (3)$$

$$\int_{R_0}^{R(t)} \frac{1}{R} dR = -kp^n \int_0^t t^n dt \quad (4)$$

$$[\ln R]_{R_0}^{R(t)} = -kp^n \left[ \frac{t^{n+1}}{n+1} \right]_0^t \quad (5)$$

$$\ln \frac{R(t)}{R_0} = -kp^n \frac{t^{n+1}}{n+1} \quad (6)$$

$$\frac{R(t)}{R_0} = \exp\left(-\frac{kp^n t^{n+1}}{n+1}\right) \quad (7)$$

To find  $t_{1/2}$ :

$$\frac{1}{2} = \exp\left(-\frac{kp^n t_{1/2}^{n+1}}{n+1}\right) \quad (8)$$

$$-\ln 2 = -\frac{kp^n t_{1/2}^{n+1}}{n+1} \quad (9)$$

$$t_{1/2}^{n+1} = \frac{(n+1) \ln 2}{kp^n} \quad (10)$$

$$t_{1/2} = p^{-\frac{n}{n+1}} \left(\frac{(n+1) \ln 2}{k}\right)^{\frac{1}{n+1}} \quad (11)$$

Estimate  $k$  from  $t_{1/2}$ :

$$k = \frac{(n+1) \ln 2}{t_{1/2}^{n+1} p^n} \quad (12)$$

Let  $T = t/t_{1/2}$ , and substitute  $t = t_{1/2}T$  into (7):

$$\frac{R(t)}{R_0} = \exp\left(-\frac{kp^n (t_{1/2}T)^{n+1}}{(n+1)}\right) \quad (13)$$

$$= \exp\left(-\frac{kp^n \left(\left[p^{-\frac{n}{n+1}} \left(\frac{(n+1)\ln 2}{k}\right)^{\frac{1}{n+1}}\right] T\right)^{n+1}}{(n+1)}\right) \quad (14)$$

$$= \exp\left(-\frac{kp^n p^{-n} \left(\frac{(n+1)\ln 2}{k}\right) T^{n+1}}{(n+1)}\right) \quad (15)$$

$$= \exp(-T^{n+1} \ln 2) = 2^{-T^{n+1}} \quad (16)$$

$$= \exp(-(t/t_{1/2})^{n+1} \ln 2) = 2^{-(t/t_{1/2})^{n+1}} \quad (17)$$

**Solution for  $m \neq 1$**

$$\frac{dR(t)}{dt} = -kR(t)^m C(t)^n = -kR(t)^m (pt)^n \quad (18)$$

$$\int_{R_0}^{R(t)} R^{-m} dR = -kp^n \int_0^t t^n dt \quad (19)$$

$$\left[\frac{R^{-m+1}}{1-m}\right]_{R_0}^{R(t)} = -kp^n \left[\frac{t^{n+1}}{n+1}\right]_0^t \quad (20)$$

$$\frac{R(t)^{-m+1}}{1-m} - \frac{R_0^{-m+1}}{1-m} = -kp^n \frac{t^{n+1}}{n+1} \quad (21)$$

$$R(t)^{-m+1} - R_0^{-m+1} = (m-1)k \frac{p^n t^{n+1}}{n+1} \quad (22)$$

$$R_0^{-m+1} \left( \left(\frac{R(t)}{R_0}\right)^{-m+1} - 1 \right) = (m-1)k \frac{p^n t^{n+1}}{n+1} \quad (23)$$

$$\frac{R(t)}{R_0} = \left( 1 + \frac{(m-1)kp^n t^{n+1}}{R_0^{-m+1}(n+1)} \right)^{-\frac{1}{m-1}} \quad (24)$$

$$= \left| 1 + \frac{(m-1)kp^n t^{n+1}}{R_0^{-m+1}(n+1)} \right|^{-\frac{1}{m-1}} \quad (25)$$

The last form with the absolute value may avoid difficulties with complex values in fitting routines. In the case of  $m \leq 0$ , the above formula only holds up to the time  $t_{\text{end}}$ , after which the concentration is zero.

$$t_{\text{end}} = \left( \frac{R_0^{1-m}(n+1)}{(1-m)kp^n} \right)^{1/(n+1)} \quad (26)$$

Using  $\lim_{i \rightarrow 0} (1 + ai)^{-1/i} = \exp(-a)$ , the limit of (24) as  $m \rightarrow 1$  is seen to be the  $m = 1$  formula (7).

Solve for  $t_{1/2}$ :

$$\frac{1}{2} = \left( \frac{(m-1)kp^n t_{1/2}^{n+1}}{R_0^{-m+1}(n+1)} + 1 \right)^{-\frac{1}{m-1}} \quad (27)$$

$$\frac{1}{2^{m-1}} = \left( \frac{(m-1)kp^n t_{1/2}^{n+1}}{R_0^{-m+1}(n+1)} + 1 \right)^{-1} \quad (28)$$

$$2^{m-1} = \frac{(m-1)kp^n t_{1/2}^{n+1}}{R_0^{-m+1}(n+1)} + 1 \quad (29)$$

$$t_{1/2} = \left( \frac{(2^{m-1}-1)R_0^{-m+1}(n+1)}{kp^n(m-1)} \right)^{\frac{1}{n+1}} \quad (30)$$

Estimate  $k$  from  $t_{1/2}$ :

$$k = \frac{(2^{m-1}-1)R_0^{-m+1}(n+1)}{t_{1/2}^{n+1}p^n(m-1)} \quad (31)$$

Similar to the above,  $t = t_{1/2}T$  is substituted into (24):

$$\frac{R(t)}{R_0} = \left( \frac{(m-1)kp^n (t_{1/2}T)^{n+1}}{R_0^{-m+1}(n+1)} + 1 \right)^{-\frac{1}{m-1}} \quad (32)$$

$$= \left( \frac{(m-1)kp^n \left( \left[ \left( \frac{(2^{m-1}-1)R_0^{-m+1}(n+1)}{kp^n(m-1)} \right)^{\frac{1}{n+1}} T \right]^{n+1} \right)}{R_0^{-m+1}(n+1)} + 1 \right)^{-\frac{1}{m-1}} \quad (33)$$

$$= \left( \frac{(m-1)kp^n \left( \frac{(2^{m-1}-1)R_0^{-m+1}(n+1)T^{n+1}}{kp^n(m-1)} \right)}{R_0^{-m+1}(n+1)} + 1 \right)^{-\frac{1}{m-1}} \quad (34)$$

$$= (1 + (2^{m-1}-1)T^{n+1})^{-\frac{1}{m-1}} \quad (35)$$

$$= (1 + (2^{m-1}-1)(t/t_{1/2})^{n+1})^{-\frac{1}{m-1}} \quad (36)$$

Again, taking the limit as  $m \rightarrow 1$  gives the first-order result (16).

### Combined equations

As functions of the parameters:

$$R(t) = \begin{cases} R_0 \exp\left(-\frac{p^n kt^{n+1}}{n+1}\right), & m = 1 \\ R_0 \left(1 + \frac{(m-1)kp^n t^{n+1}}{R_0^{-m+1}(n+1)}\right)^{-\frac{1}{m-1}}, & m \neq 1 \end{cases} \quad (37)$$

In terms of  $t/t_{1/2}$ :

$$\frac{R(t)}{R_0} = \begin{cases} 2^{-(t/t_{1/2})^{n+1}}, & m = 1 \\ \left(1 + (2^{m-1} - 1) (t/t_{1/2})^{n+1}\right)^{-\frac{1}{m-1}}, & m \neq 1 \end{cases} \quad (38)$$

$t_{1/2}$

$$t_{1/2} = \begin{cases} p^{-\frac{n}{n+1}} \left(\frac{(n+1) \ln 2}{k}\right)^{\frac{1}{n+1}}, & m = 1 \\ \left(\frac{(2^{m-1}-1)R_0^{-m+1}(n+1)}{kp^n(m-1)}\right)^{\frac{1}{n+1}}, & m \neq 1 \end{cases} \quad (39)$$

$k$  from  $t_{1/2}$

$$k = \begin{cases} \frac{(n+1) \ln 2}{t_{1/2}^{n+1} p^n}, & m = 1 \\ \frac{(2^{m-1}-1)R_0^{-m+1}(n+1)}{t_{1/2}^{n+1} p^n(m-1)}, & m \neq 1 \end{cases} \quad (40)$$

**Derivation of relationship between  $t_{1/2}$ ,  $t_k$  and  $t_p$**

**Case of  $m = 1$**

In a conventional experiment at catalyst concentration  $C_{\text{ref}}$

$$-\frac{dR(t)}{dt} = kR_0C_{\text{ref}}^n = k'R_0 \quad (41)$$

where  $k' = kC_{\text{ref}}^n$  is the pseudo-first-order rate constant. The half-life is well known to be  $t_k = \ln(2)/k'$  and we define the characteristic pumping time  $t_p$  as the time to add catalyst to concentration  $C_{\text{ref}}$ , i.e.,  $t_p = C_{\text{ref}}/p$ . Therefore

$$t_k t_p^n = \frac{\ln(2)}{kC_{\text{ref}}^n} \left(\frac{C_{\text{ref}}}{p}\right)^n \quad (42)$$

$$= \frac{\ln(2)}{kp^n} \quad (43)$$

But the half-life in the CAKE experiment is

$$t_{1/2} = \frac{1}{p} \left(\frac{p(n+1) \ln 2}{k}\right)^{\frac{1}{n+1}} \quad (44)$$

$$t_{1/2}^{n+1} = \frac{(n+1) \ln 2}{kp^n} \quad (45)$$

and comparing with the above, we see

$$t_{1/2}^{n+1} = (n+1)t_k t_p^n \quad (46)$$

**Case of  $m \neq 1$**

The half life for the general  $m$ th order reaction is known to be (Laidler)

$$t_k = \frac{2^{m-1} - 1}{(m-1)R_0^{m-1}k'} \quad (47)$$

and combining with  $t_p^n$  gives

$$t_k t_p^n = \frac{2^{m-1} - 1}{(m-1)R_0^{m-1} k C_{\text{ref}}^n} \left( \frac{C_{\text{ref}}}{p} \right)^n \quad (48)$$

$$= \frac{2^{m-1} - 1}{(m-1)R_0^{m-1} k p^n} \quad (49)$$

Compare with

$$t_{1/2} = \left( \frac{(2^{m-1} - 1) R_0^{-m+1} (n+1)}{k p^n (m-1)} \right)^{\frac{1}{n+1}} \quad (50)$$

$$t_{1/2}^{n+1} = \frac{(2^{m-1} - 1) (n+1)}{k p^n R_0^{m-1} (m-1)} \quad (51)$$

and we again find

$$t_{1/2}^{n+1} = (n+1) t_k t_p^n \quad (52)$$

**To show**  $t_{1/2} \geq \min(t_k, t_p)$  and  $t_{1/2} \leq 1.4447 \max(t_k, t_p)$

It is simplest to work with the logs of these quantities:

$$(n+1) \ln t_{1/2} = \ln(n+1) + \ln t_k + n \ln t_p \quad (53)$$

$$\ln t_{1/2} = \ln(n+1)^{1/(n+1)} + \frac{1}{n+1} \ln t_k + \frac{n}{n+1} \ln t_p \quad (54)$$

Consider first the case where  $t_k \geq t_p$  or  $t_k/t_p = q$  with  $q \geq 1$ . We want to show that  $t_{1/2} \geq t_p$

$$\ln t_{1/2} = \ln(n+1)^{1/(n+1)} + \frac{1}{n+1} \ln q t_p + \frac{n}{n+1} \ln t_p \quad (55)$$

$$= \ln(n+1)^{1/(n+1)} + \frac{1}{n+1} \ln q + \frac{1}{n+1} \ln t_p + \frac{n}{n+1} \ln t_p \quad (56)$$

$$= \ln [q(n+1)]^{1/(n+1)} + \frac{1}{n+1} \ln t_p + \frac{n}{n+1} \ln t_p \quad (57)$$

$$= \ln [q(n+1)]^{1/(n+1)} + \ln t_p \quad (58)$$

Now  $q \geq 1$ ,  $n \geq 0$  so  $q(n+1) \geq 1$ . Raising any number  $\geq 1$  to a positive power gives a number  $\geq 1$ , so  $[q(n+1)]^{1/(n+1)} \geq 1$ ,  $\ln [q(n+1)]^{1/(n+1)} \geq 0$  and so

$$\ln t_{1/2} \geq \ln t_p \quad (59)$$

$$t_{1/2} \geq t_p \quad (60)$$

(using the monotonicity of the  $\ln$  function).

For this case  $t_k \geq t_p$  we also want to know what the largest  $t_{1/2}$  value can be:

$$\ln t_{1/2} = \ln(n+1)^{1/(n+1)} + \frac{1}{n+1} \ln t_k + \frac{n}{n+1} \ln \frac{t_k}{q} \quad (61)$$

$$= \ln(n+1)^{1/(n+1)} + \frac{n}{n+1} \ln \frac{1}{q} + \frac{1}{n+1} \ln t_k + \frac{n}{n+1} \ln t_k \quad (62)$$

$$= \ln \frac{(n+1)^{1/(n+1)}}{q^{n/(n+1)}} + \frac{1}{n+1} \ln t_k + \frac{n}{n+1} \ln t_k \quad (63)$$

$$= \ln \frac{(n+1)^{1/(n+1)}}{q^{n/(n+1)}} + \ln t_k \quad (64)$$

For fixed  $n$ ,  $(n+1)^{1/(n+1)}/q^{n/(n+1)}$  decreases as  $q$  increases from 1 (its derivative is explicitly negative) and so its largest value occurs for  $q = 1$ , when it equals  $(n+1)^{1/(n+1)}$ . The value of  $(n+1)^{1/(n+1)}$  is always larger than or equal to one, and has its maximum when

$$0 = \frac{d(n+1)^{1/(n+1)}}{dn} = (n+1)^{1/(n+1)} \frac{(1 - \ln(n+1))}{(n+1)^2} \quad (65)$$

$$0 = 1 - \ln(n+1) \quad (66)$$

$$n+1 = \exp(1) \quad (67)$$

$$n = \exp(1) - 1 = 1.718 \quad (68)$$

The maximum value is therefore

$$(n+1)^{1/(n+1)} = \exp(1)^{1/\exp(1)} = 1.4447 \quad (69)$$

and therefore the largest value of  $t_{1/2}$  is  $1.445t_k$ , which occurs when  $t_k = t_p$  and  $n = 1.718$ .

For the case where  $t_p \geq t_k$  or  $t_p/t_k = q$  with  $q \geq 1$ . We want to show that  $t_{1/2} \geq t_k$ . We proceed similarly to the above.

$$\ln t_{1/2} = \ln(n+1)^{1/(n+1)} + \frac{1}{n+1} \ln t_k + \frac{n}{n+1} \ln qt_k \quad (70)$$

$$= \ln(n+1)^{1/(n+1)} + \frac{n}{n+1} \ln q + \frac{1}{n+1} \ln t_k + \frac{n}{n+1} \ln t_k \quad (71)$$

$$= \ln \left[ q^{n/(n+1)} (n+1)^{1/(n+1)} \right] + \frac{1}{n+1} \ln t_k + \frac{n}{n+1} \ln t_k \quad (72)$$

$$= \ln \left[ q^{n/(n+1)} (n+1)^{1/(n+1)} \right] + \ln t_k \quad (73)$$

Now  $q \geq 1$ ,  $n \geq 0$  so  $q^{n/(n+1)} \geq 1$ ,  $(n+1)^{1/(n+1)} \geq 1$  and therefore  $q^{n/(n+1)}(n+1)^{1/(n+1)} \geq 1$  leading to

$$\ln t_{1/2} \geq \ln t_k \quad (74)$$

$$t_{1/2} \geq t_k \quad (75)$$

For this case  $t_p \geq t_k$  we also want to know what the largest  $t_{1/2}$  value can be:

$$\ln t_{1/2} = \ln(n+1)^{1/(n+1)} + \frac{1}{n+1} \ln \frac{t_p}{q} + \frac{n}{n+1} \ln t_p \quad (76)$$

$$= \ln(n+1)^{1/(n+1)} + \frac{1}{n+1} \ln \frac{1}{q} + \frac{1}{n+1} \ln t_p + \frac{n}{n+1} \ln t_p \quad (77)$$

$$= \ln [(n+1)/q]^{1/(n+1)} + \frac{1}{n+1} \ln t_p + \frac{n}{n+1} \ln t_p \quad (78)$$

$$= \ln [(n+1)/q]^{1/(n+1)} + \ln t_p \quad (79)$$

For fixed  $n$ ,  $[(n+1)/q]^{1/(n+1)}$  decreases as  $q$  increases from 1 (its derivative is explicitly negative) and so its largest value occurs for  $q = 1$ , when it equals  $(n+1)^{1/(n+1)}$ , which as above has a maximum value of 1.4447. Therefore in this case, the largest value of  $t_{1/2}$  is  $1.4447t_p$ .
